# Supplementary material for: ATAC-Seq identifies regions of open chromatin in the bronchial lymph nodes of dairy calves experimentally challenged with bovine respiratory syncytial virus
Source: PubMed Central journal article supplement (PMC7789798; doi:10.1186/s12864-020-07268-5), 2021-01-06

# Insert Size Histogram for All\_Reads in file S1\_BLN\_ATAC\_aligned.bam

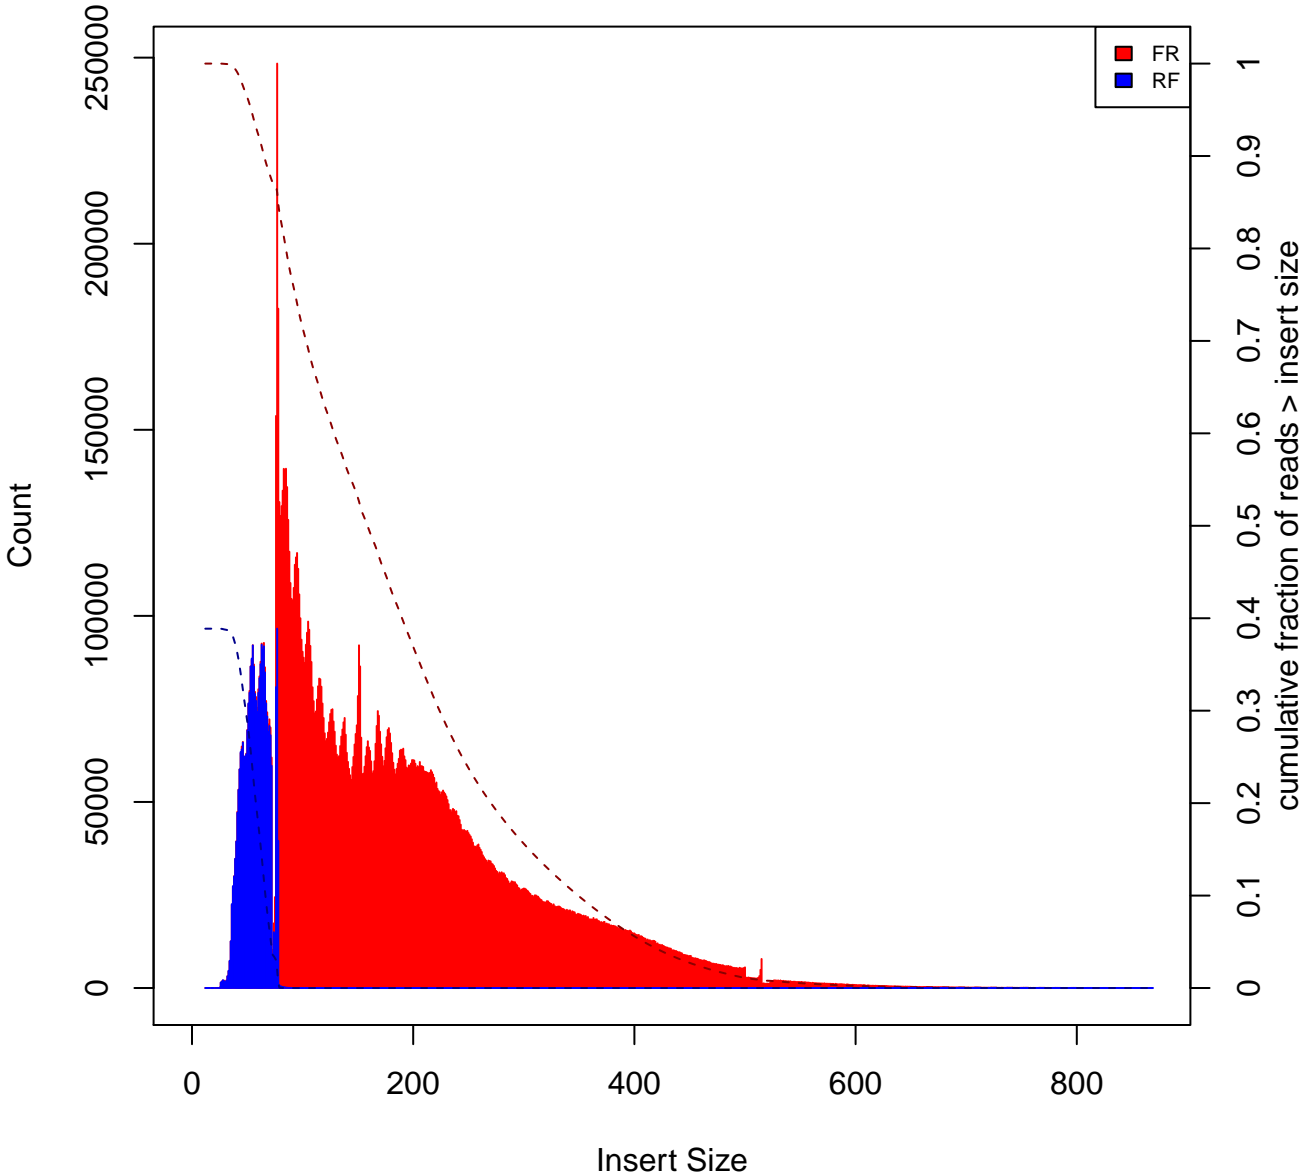

# Insert Size Histogram for All\_Reads in file S2\_BLN\_ATAC\_aligned.bam

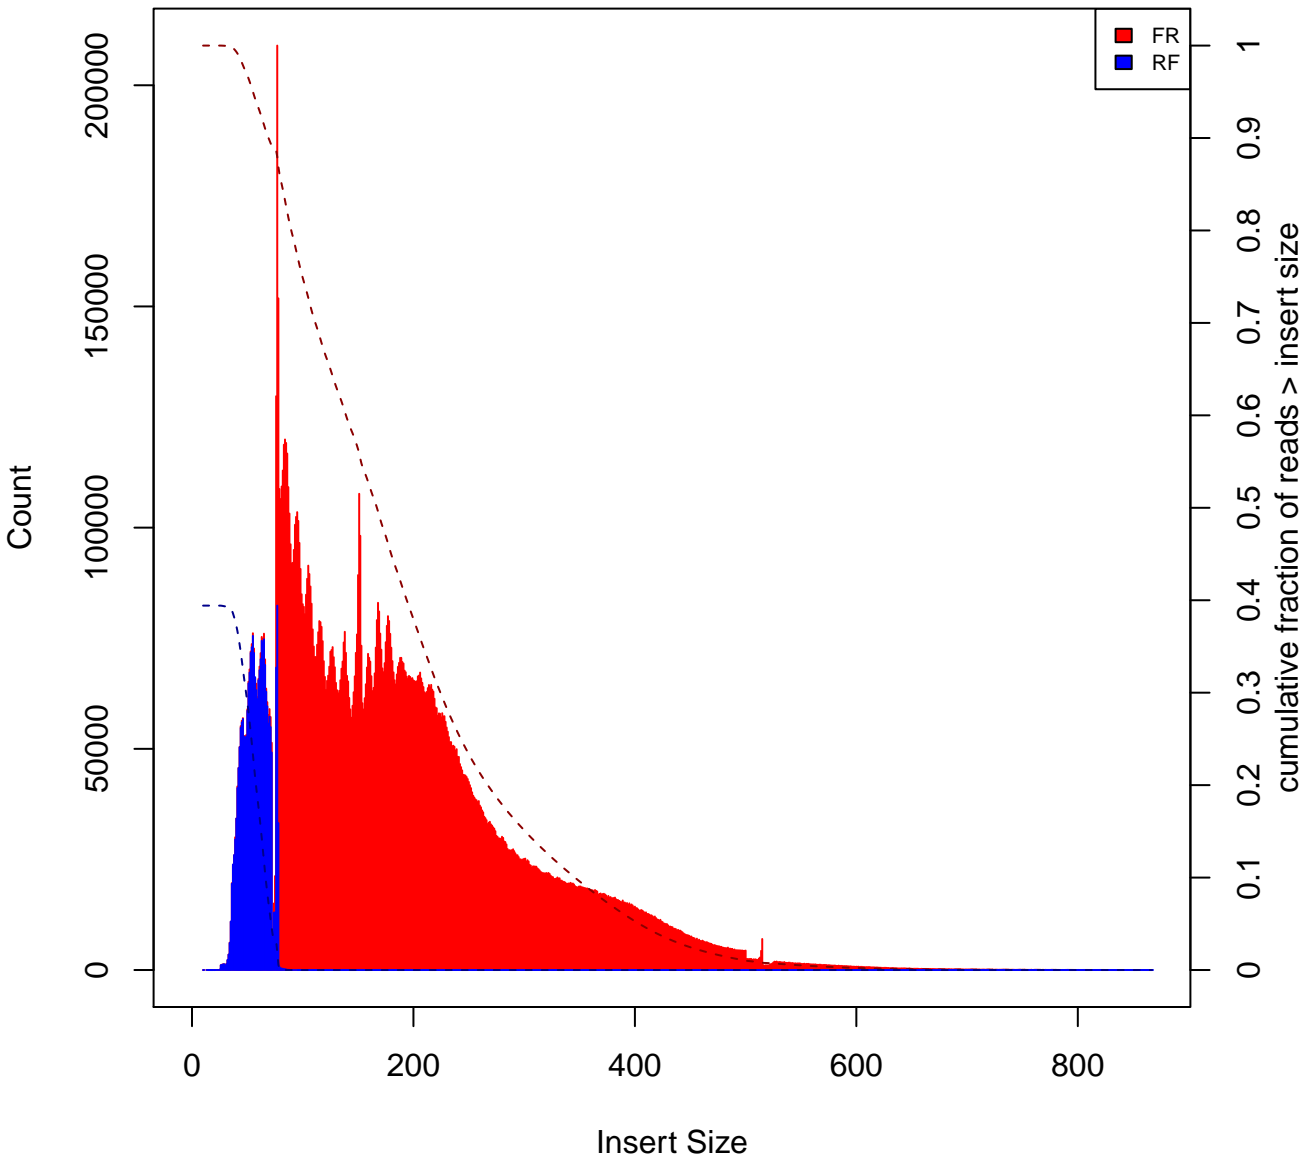

# Insert Size Histogram for All\_Reads in file S3\_BLN\_ATAC\_aligned.bam

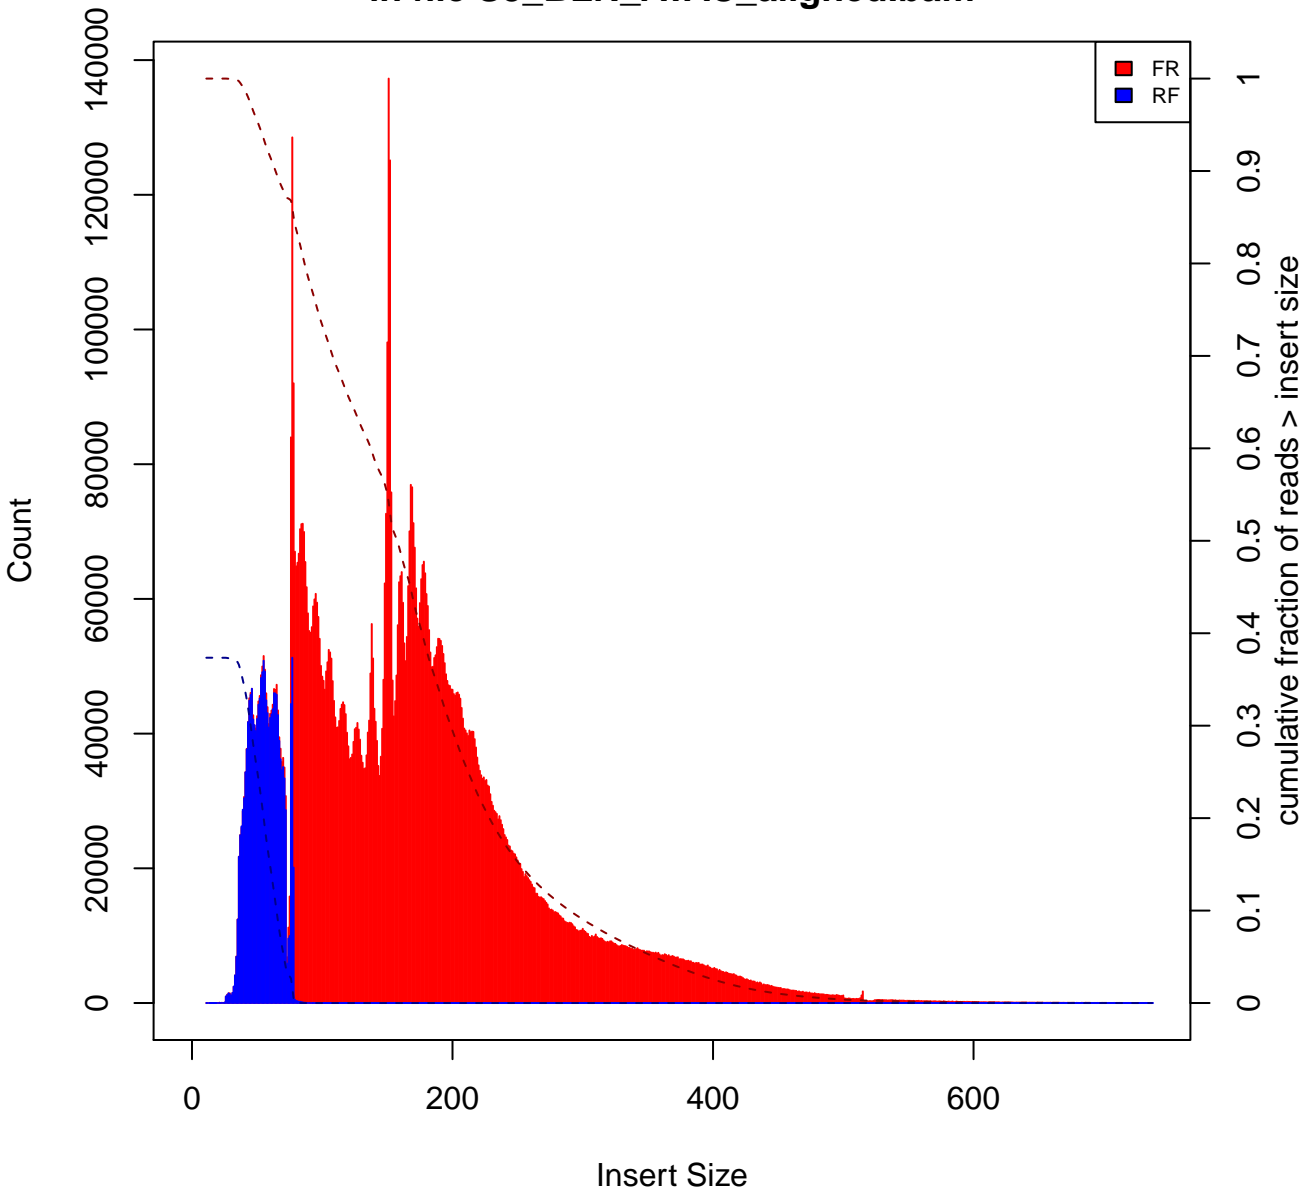

# Insert Size Histogram for All\_Reads in file S4\_BLN\_ATAC\_aligned.bam

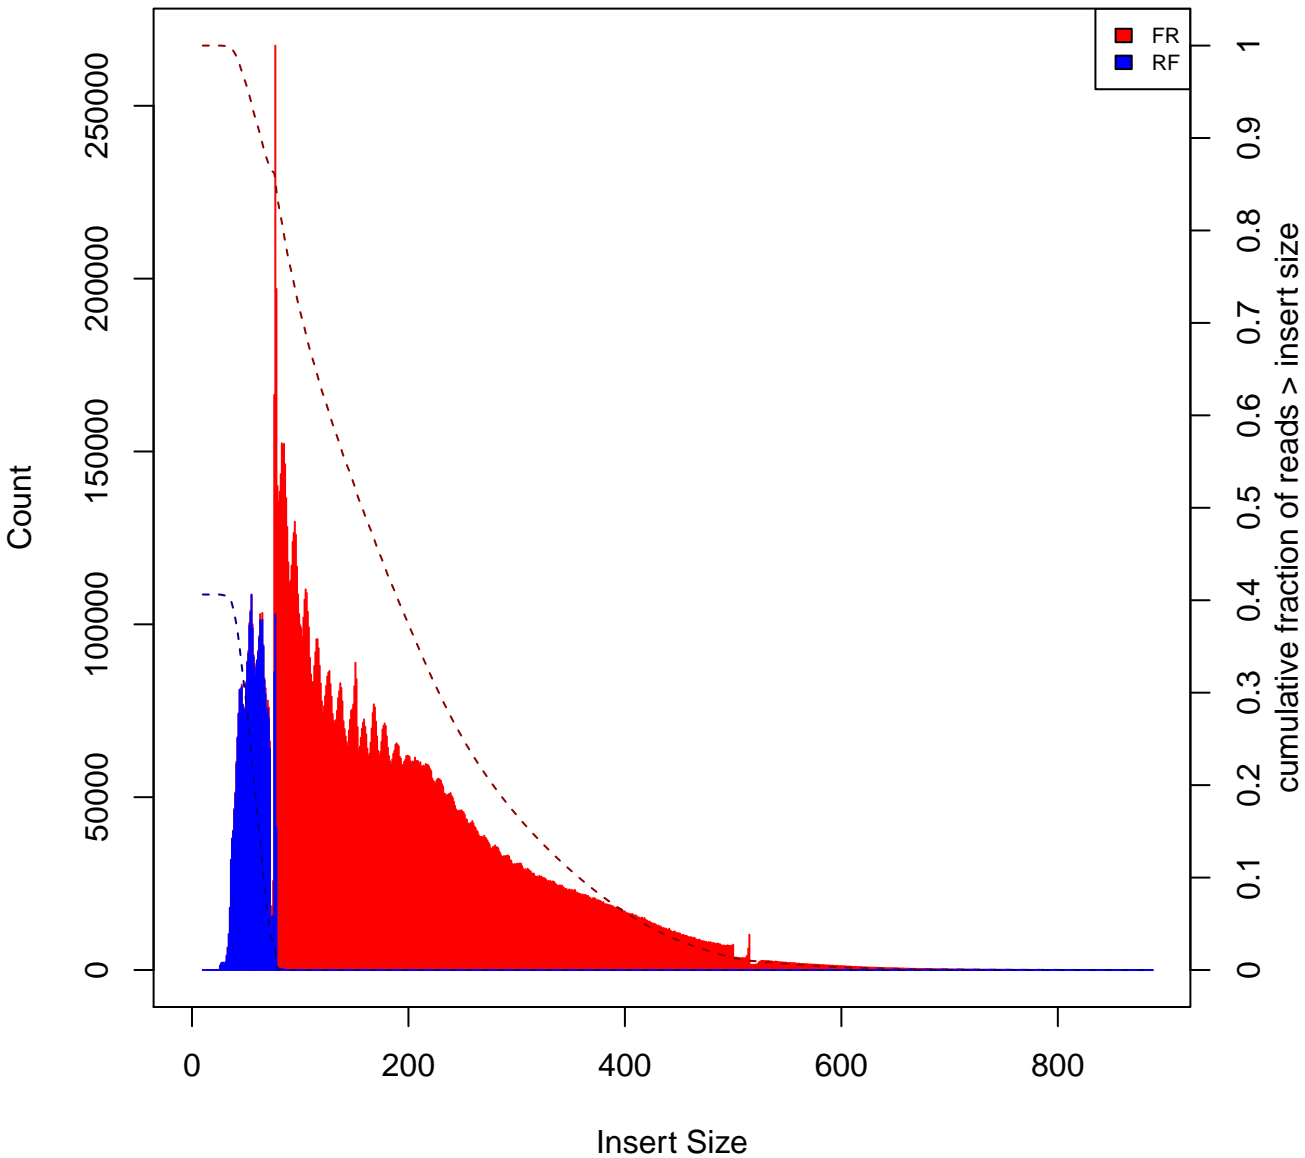

# Insert Size Histogram for All\_Reads in file S5\_BLN\_ATAC\_aligned.bam

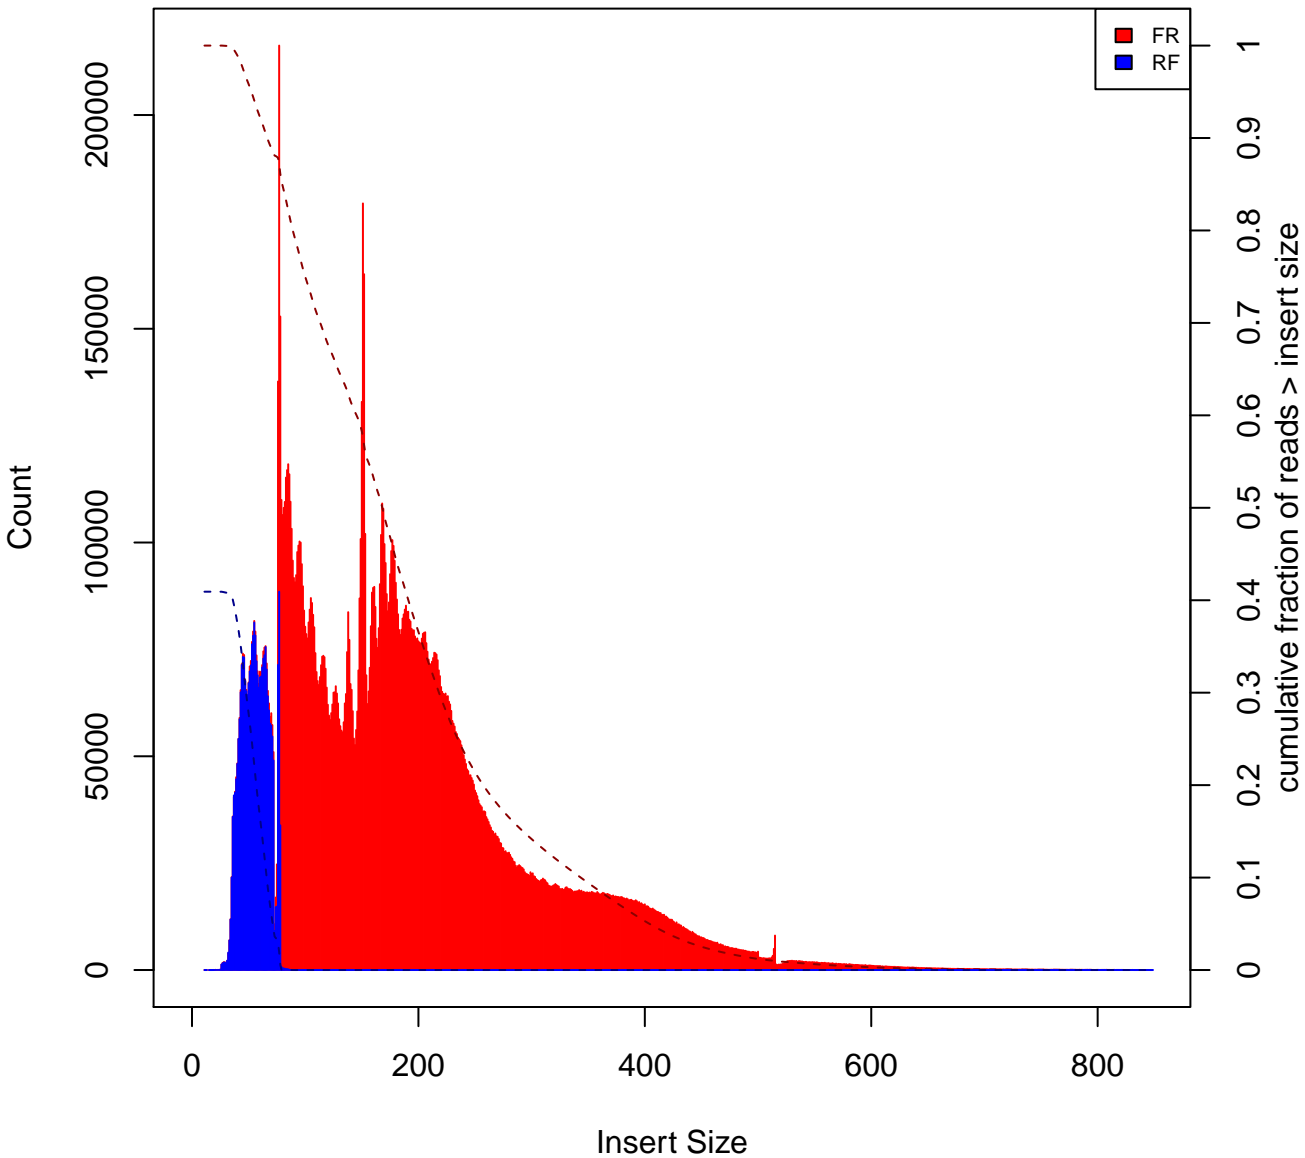

# Insert Size Histogram for All\_Reads in file S6\_BLN\_ATAC\_aligned.bam

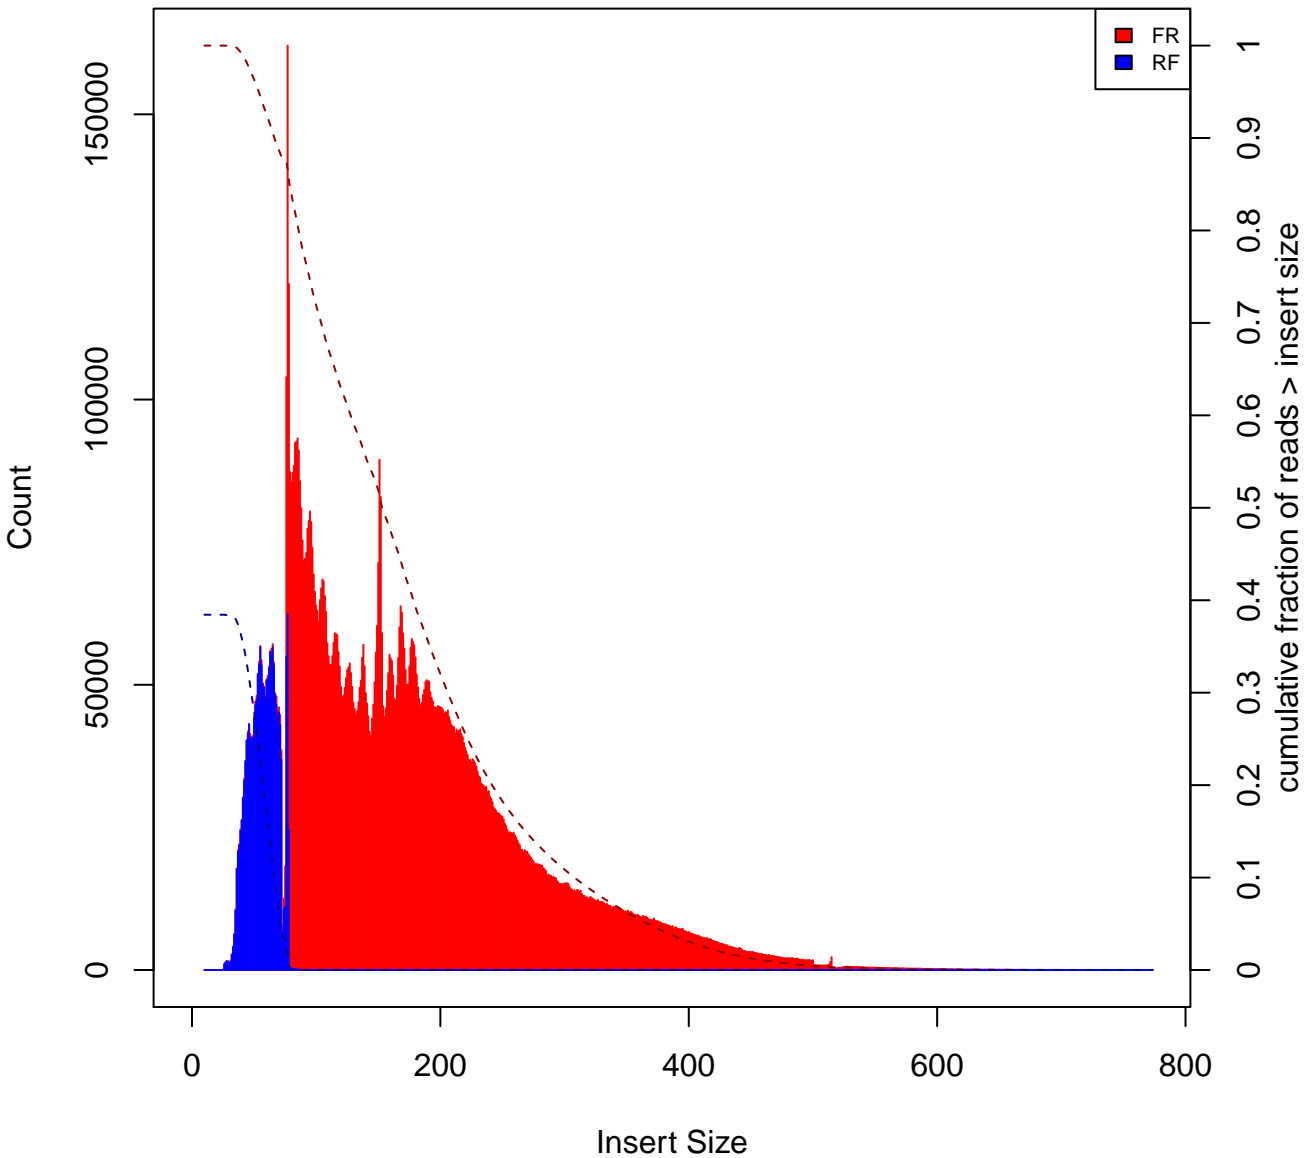

# Insert Size Histogram for All\_Reads in file S7\_BLN\_ATAC\_aligned.bam

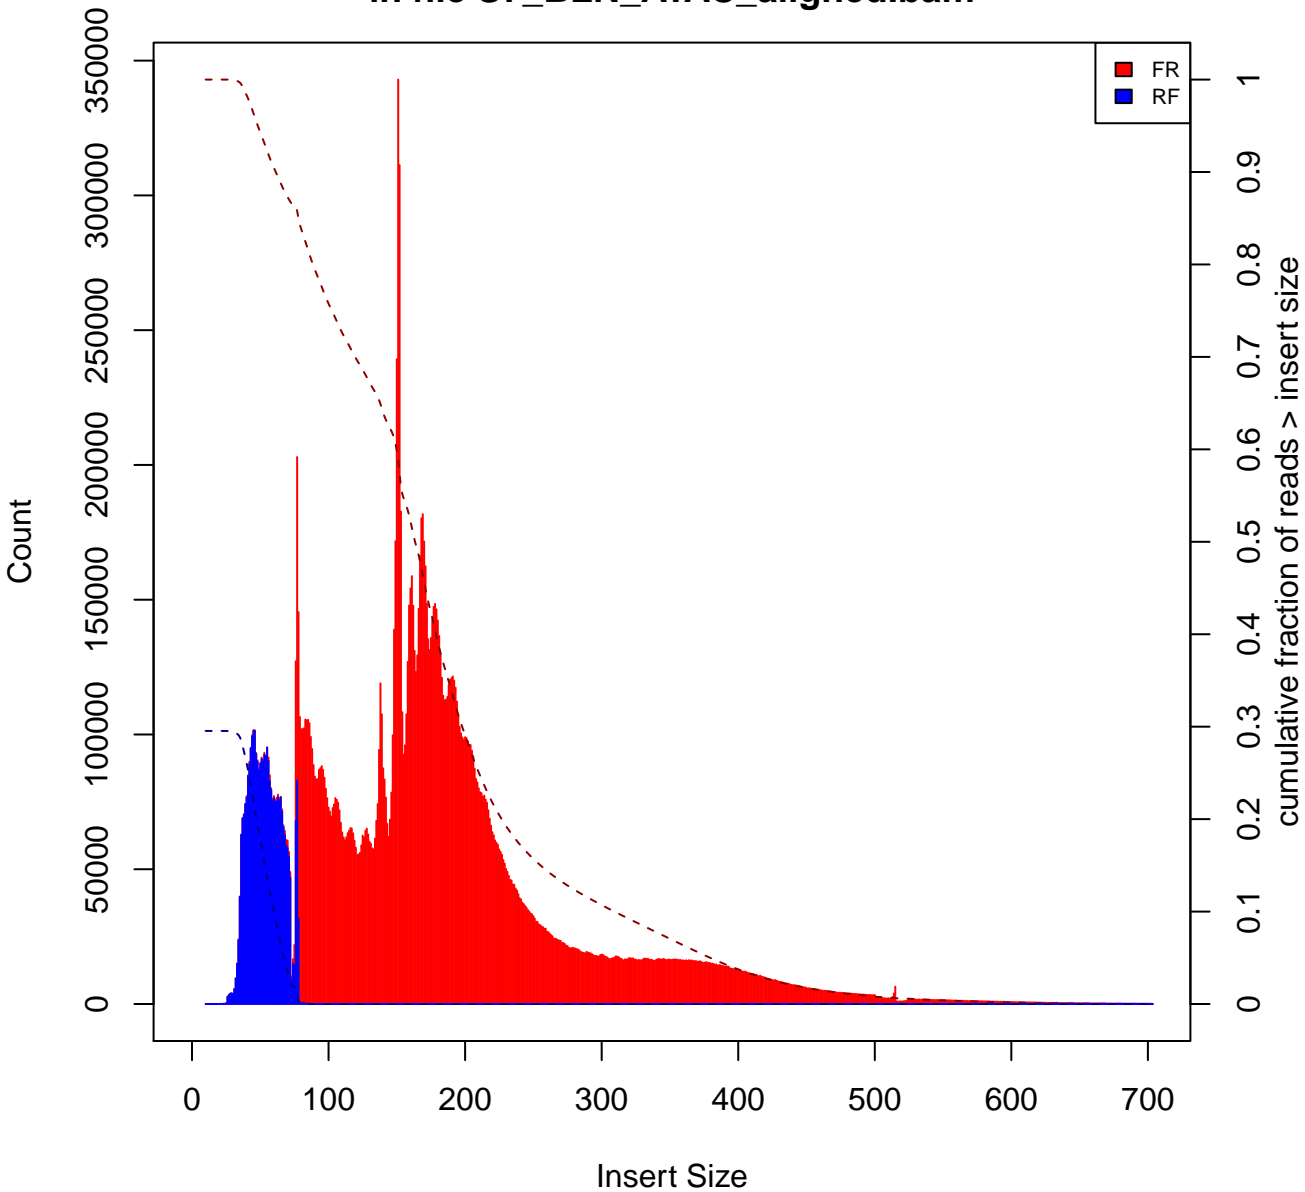

# Insert Size Histogram for All\_Reads in file S8\_BLN\_ATAC\_aligned.bam

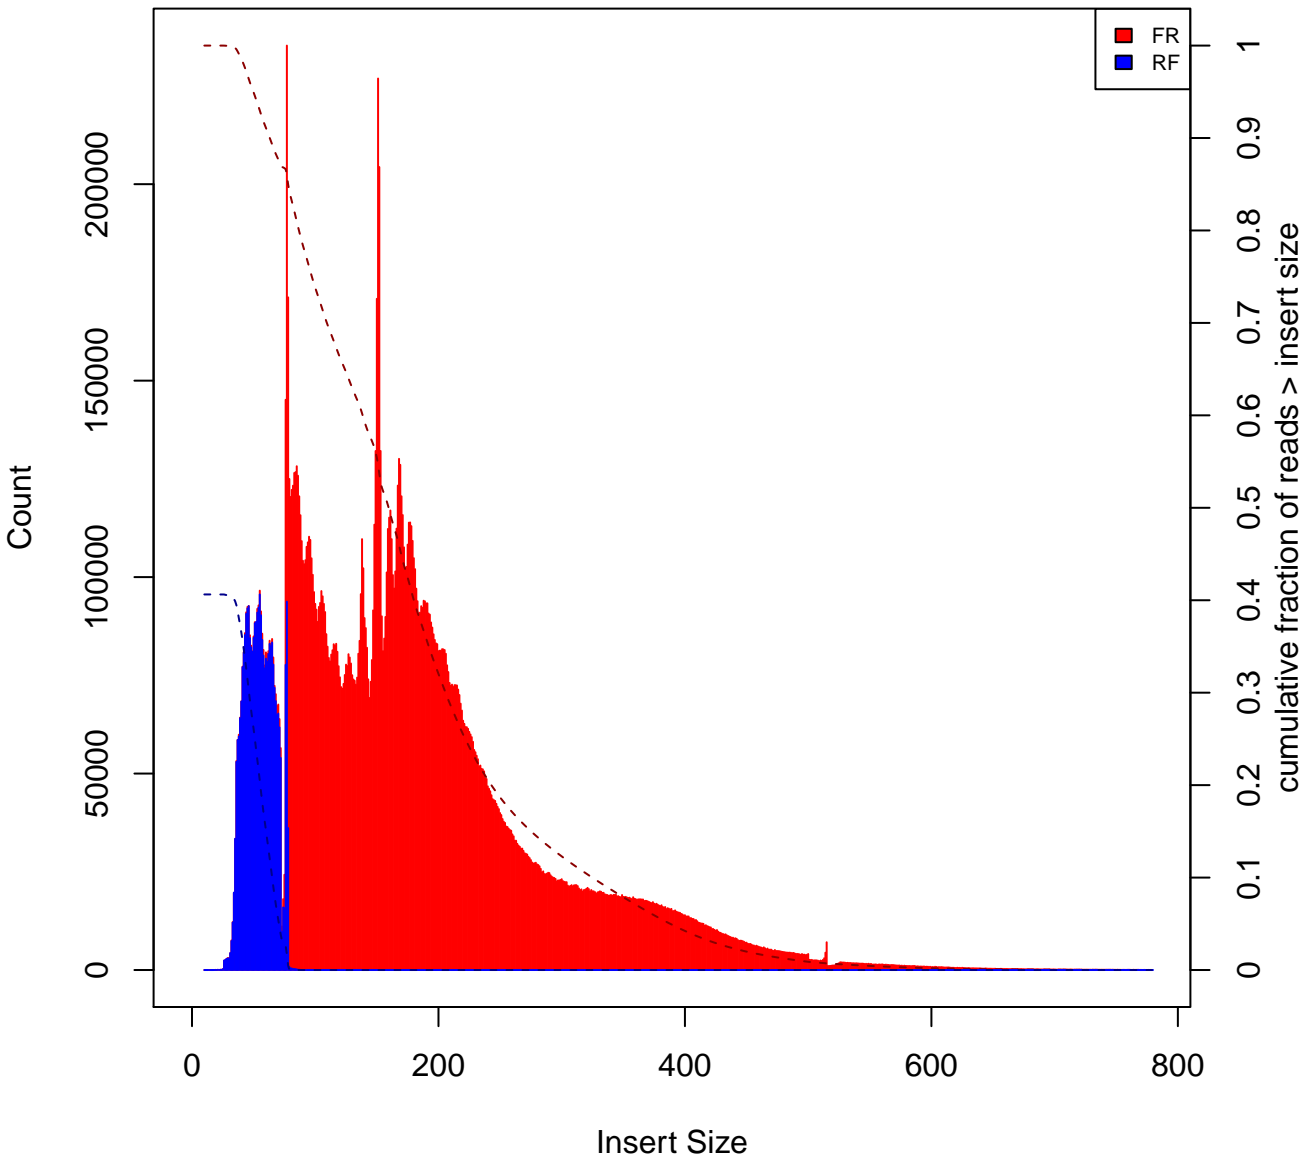



# Insert Size Histogram for All\_Reads in file S9\_BLN\_ATAC\_aligned.bam

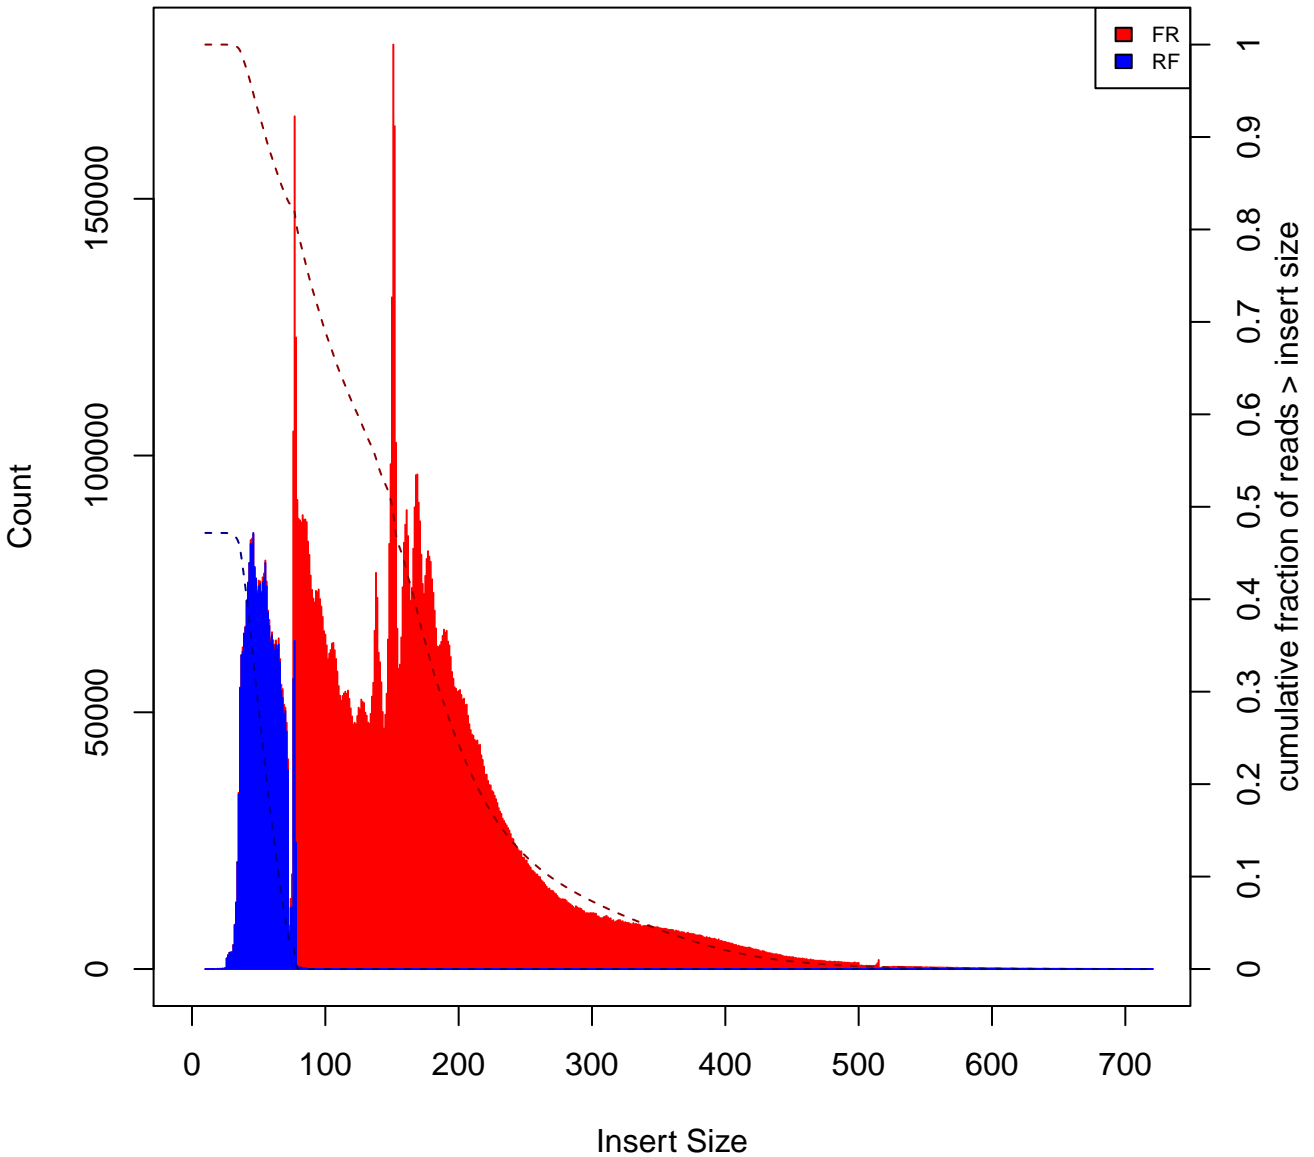

# Insert Size Histogram for All\_Reads in file S10\_BLN\_ATAC\_aligned.bam

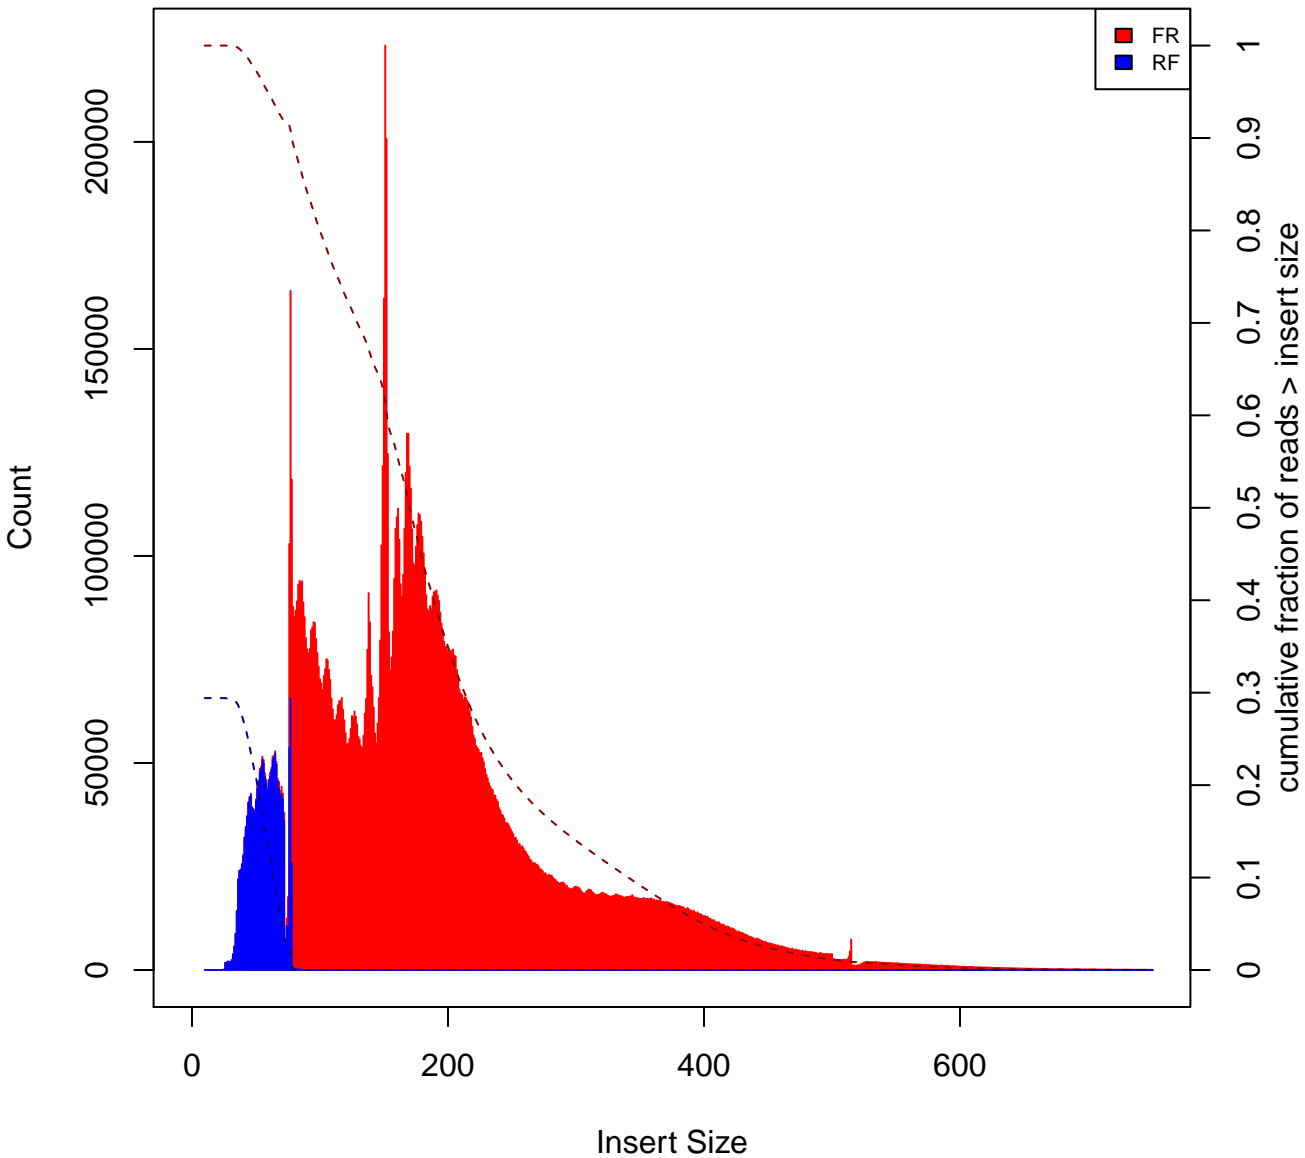

# Insert Size Histogram for All\_Reads in file S11\_BLN\_ATAC\_aligned.bam

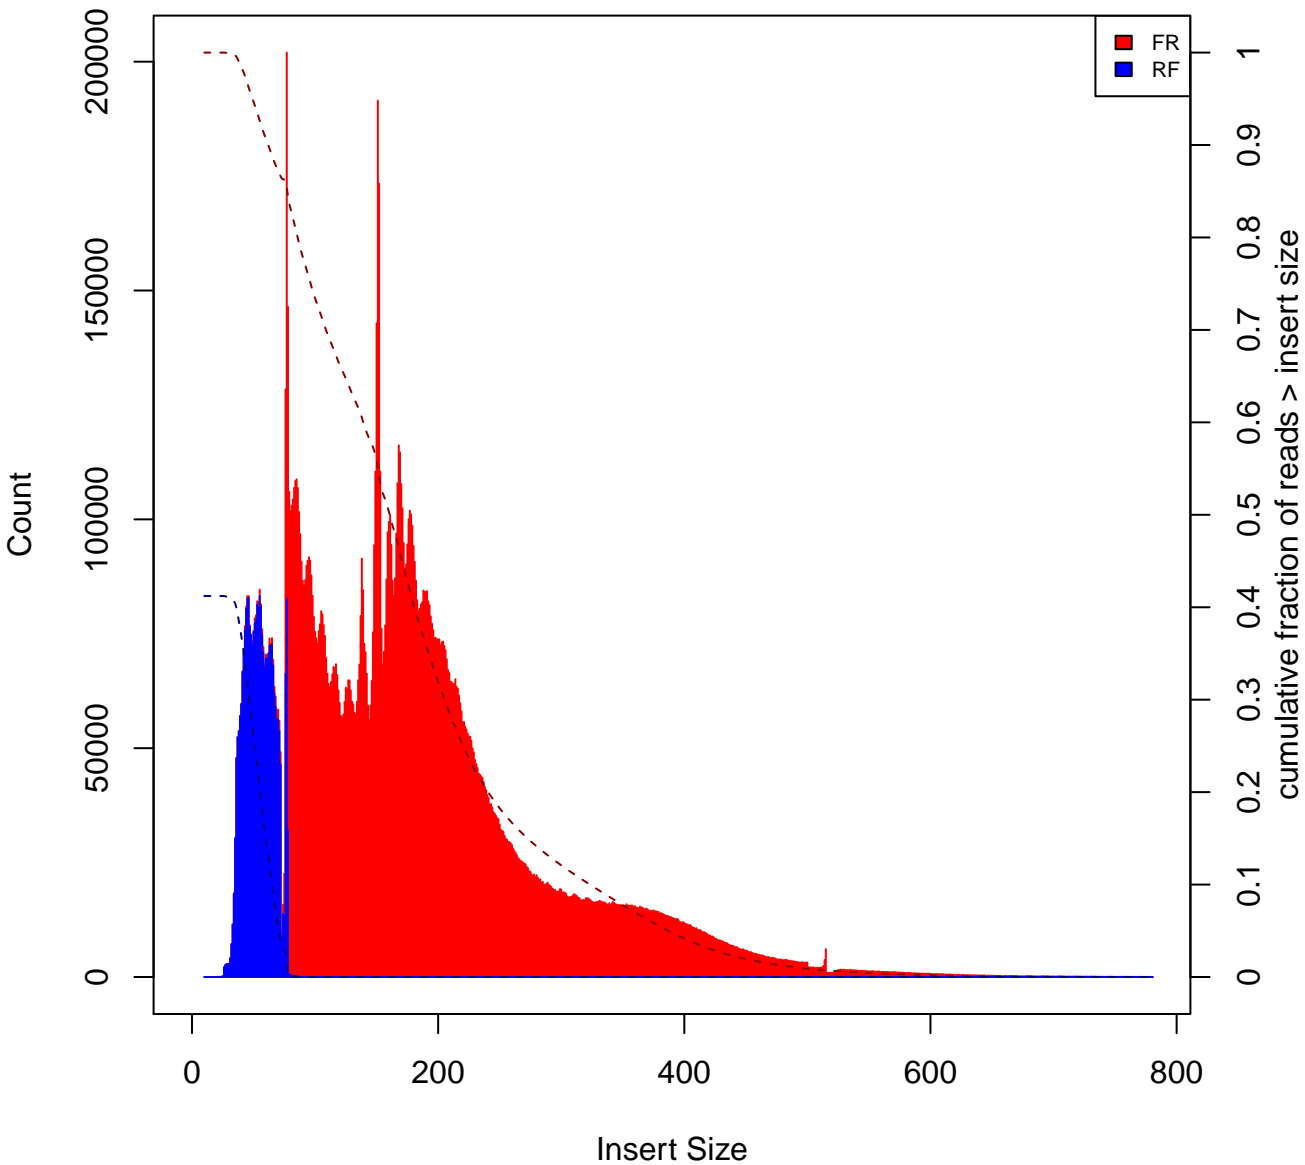

# Insert Size Histogram for All\_Reads in file S12\_BLN\_ATAC\_aligned.bam

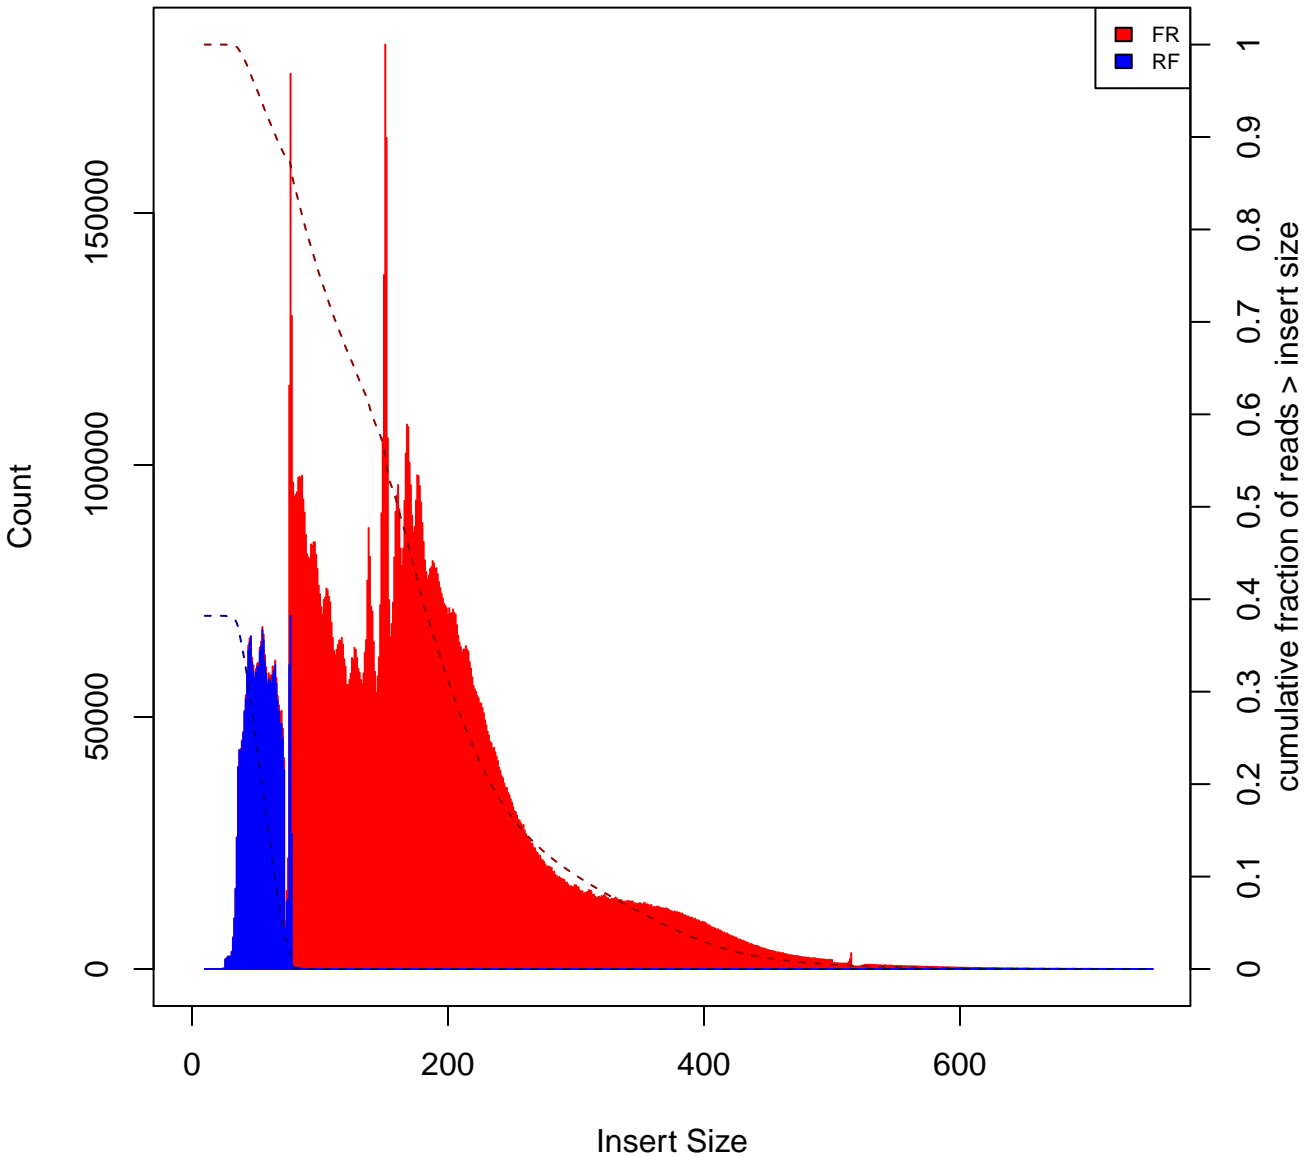

# Insert Size Histogram for All\_Reads in file S13\_BLN\_ATAC\_aligned.bam

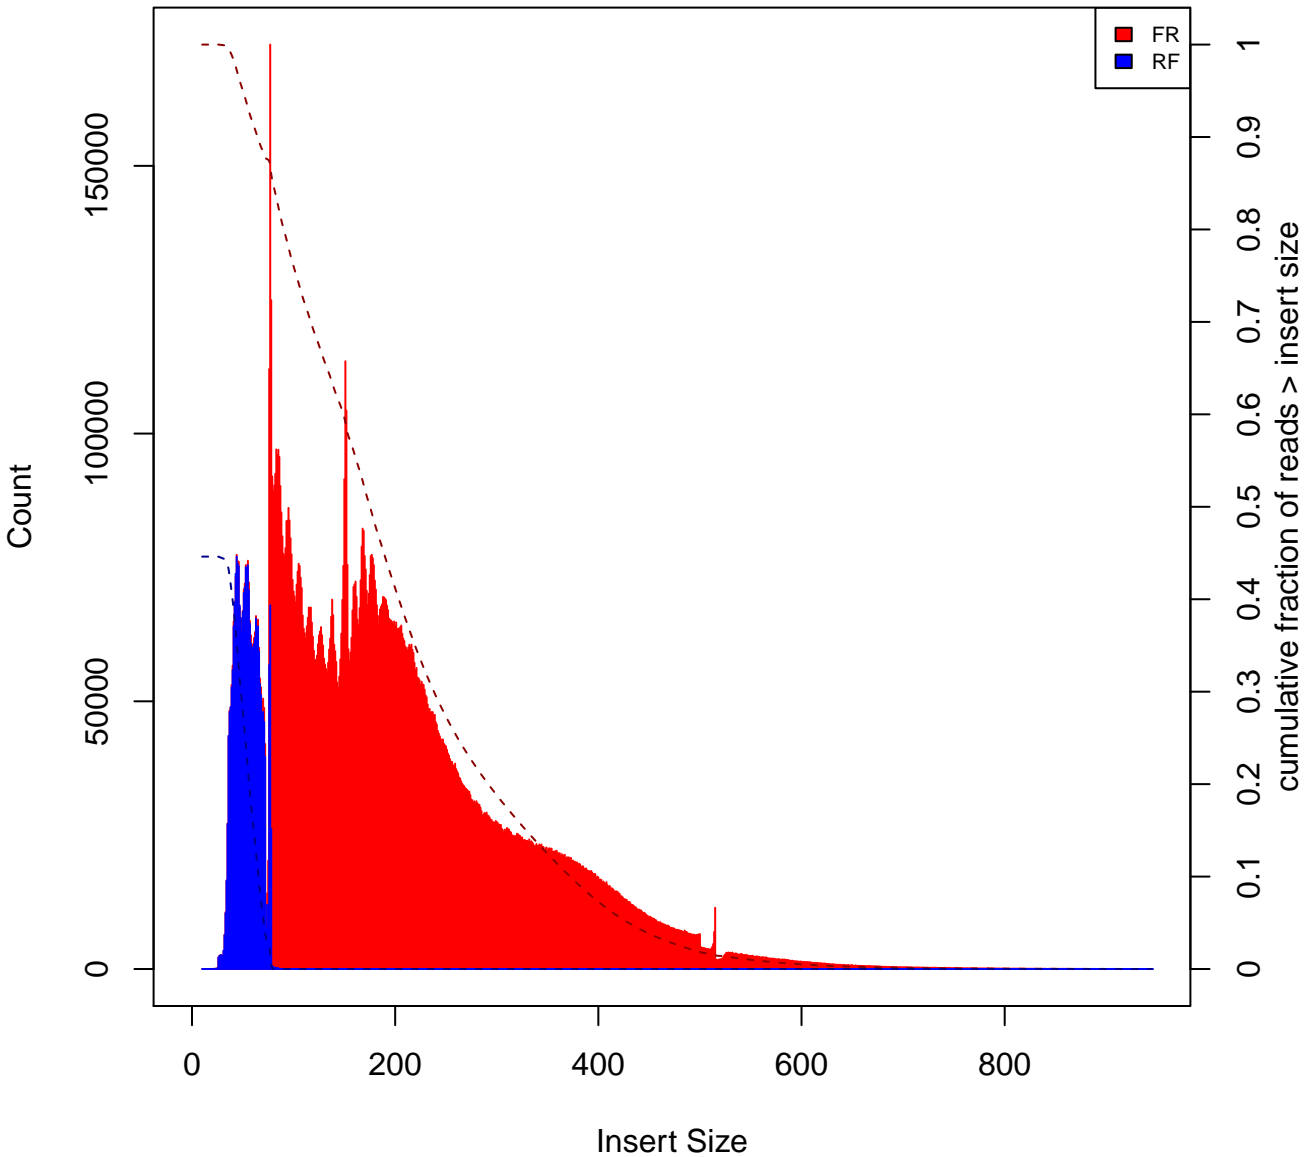

# Insert Size Histogram for All\_Reads in file S14\_BLN\_ATAC\_aligned.bam

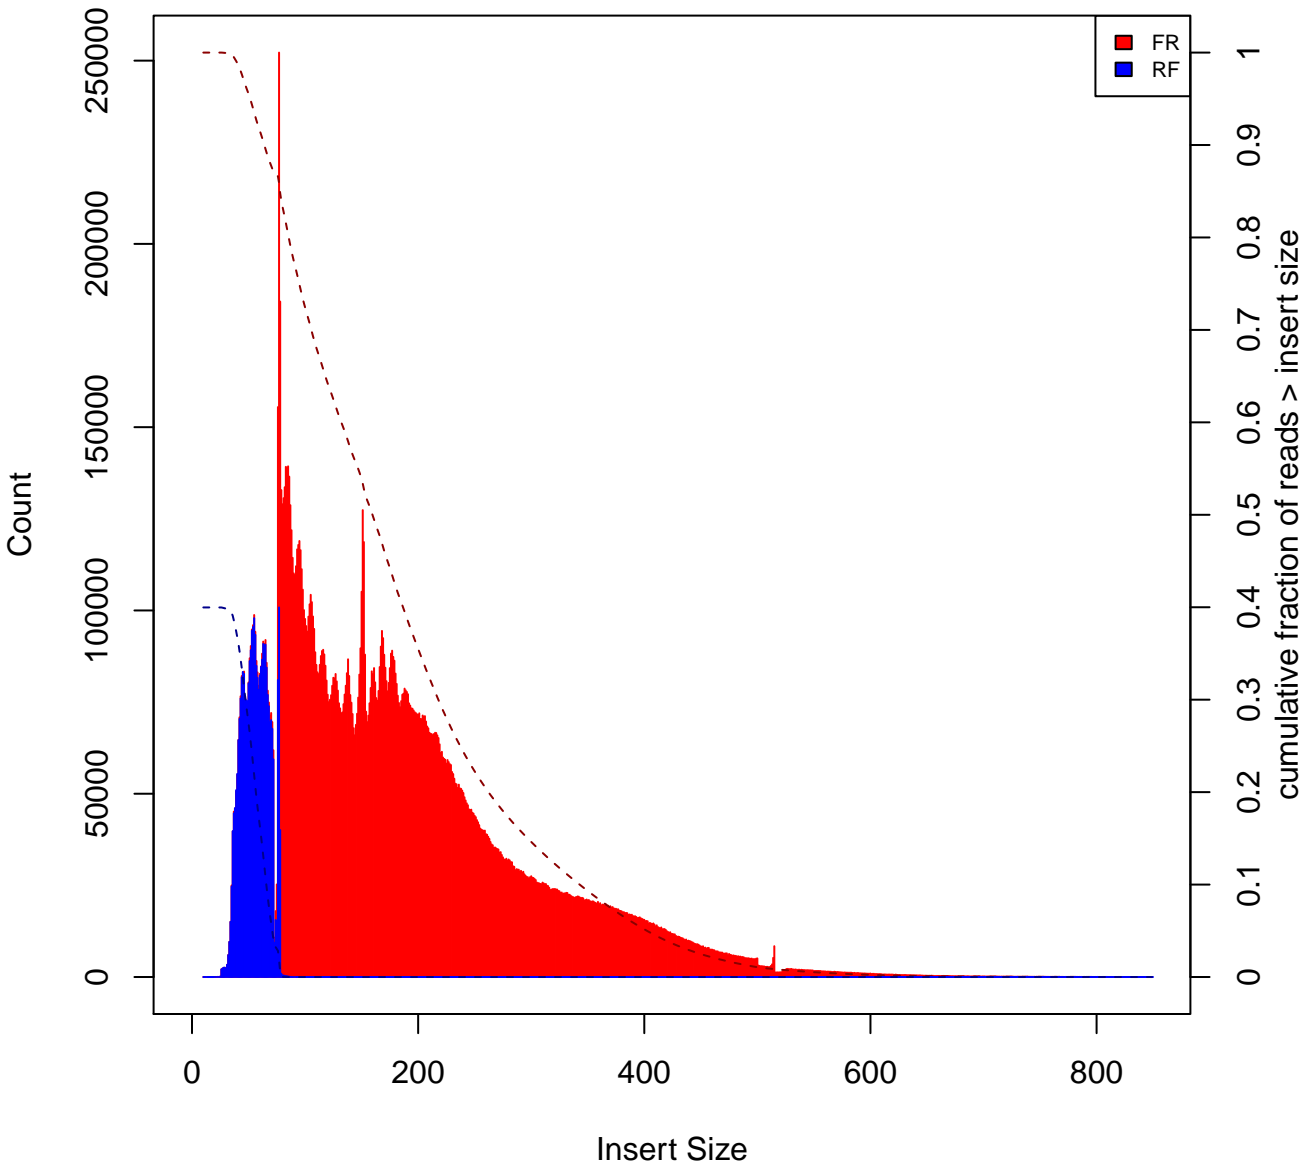

# Insert Size Histogram for All\_Reads in file S15\_BLN\_ATAC\_aligned.bam

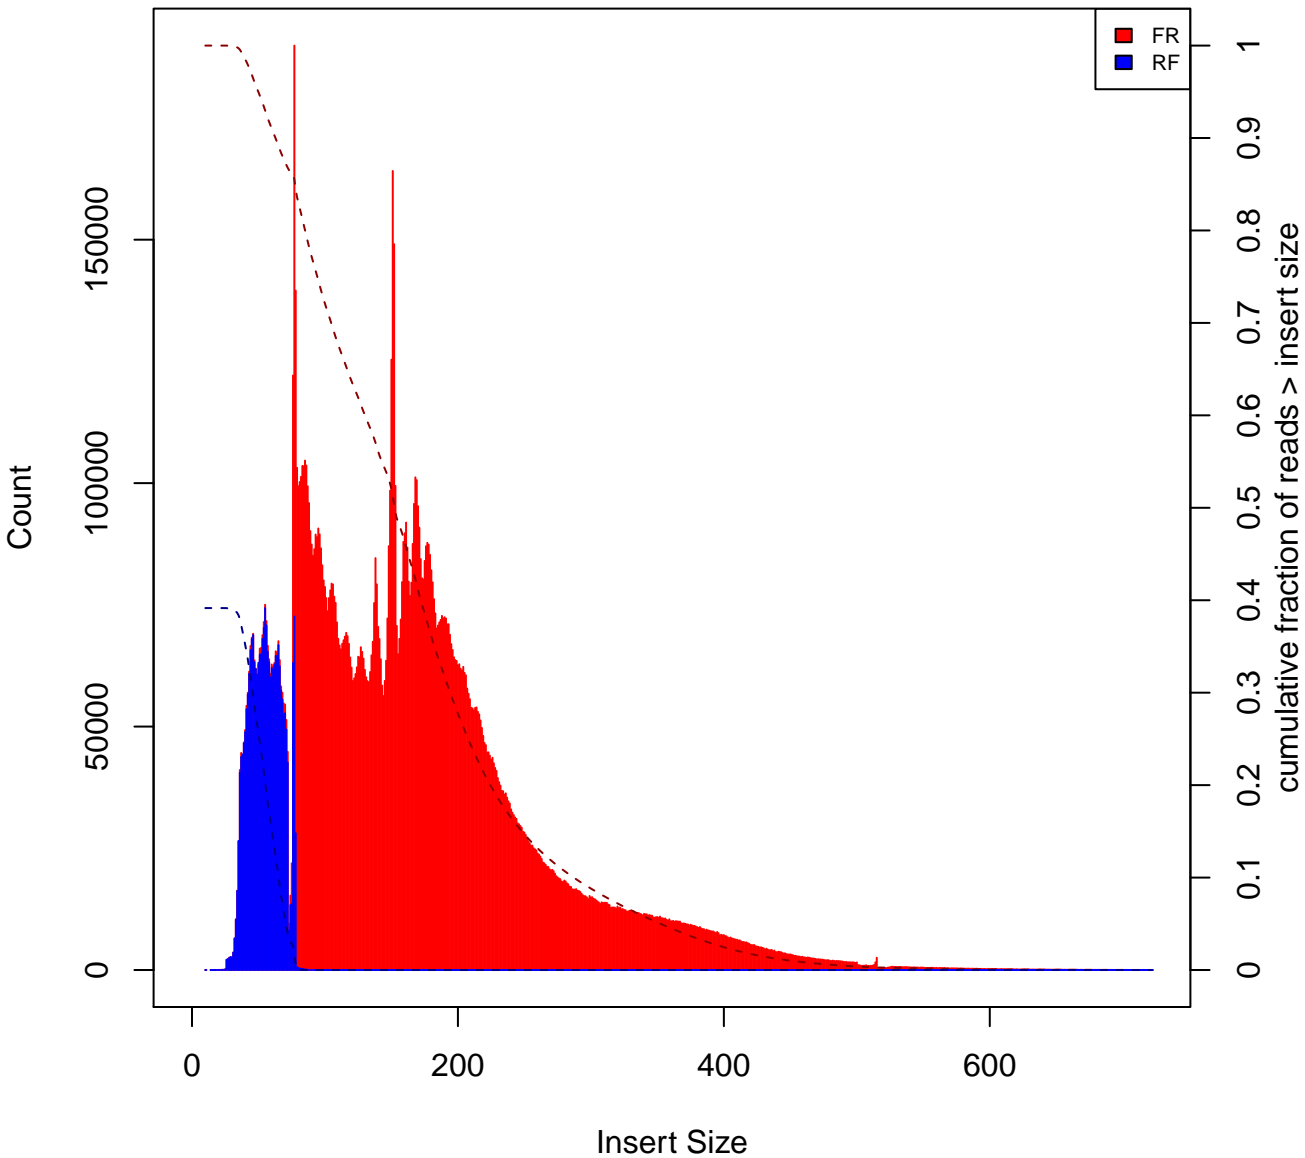

# Insert Size Histogram for All\_Reads in file S16\_BLN\_ATAC\_aligned.bam

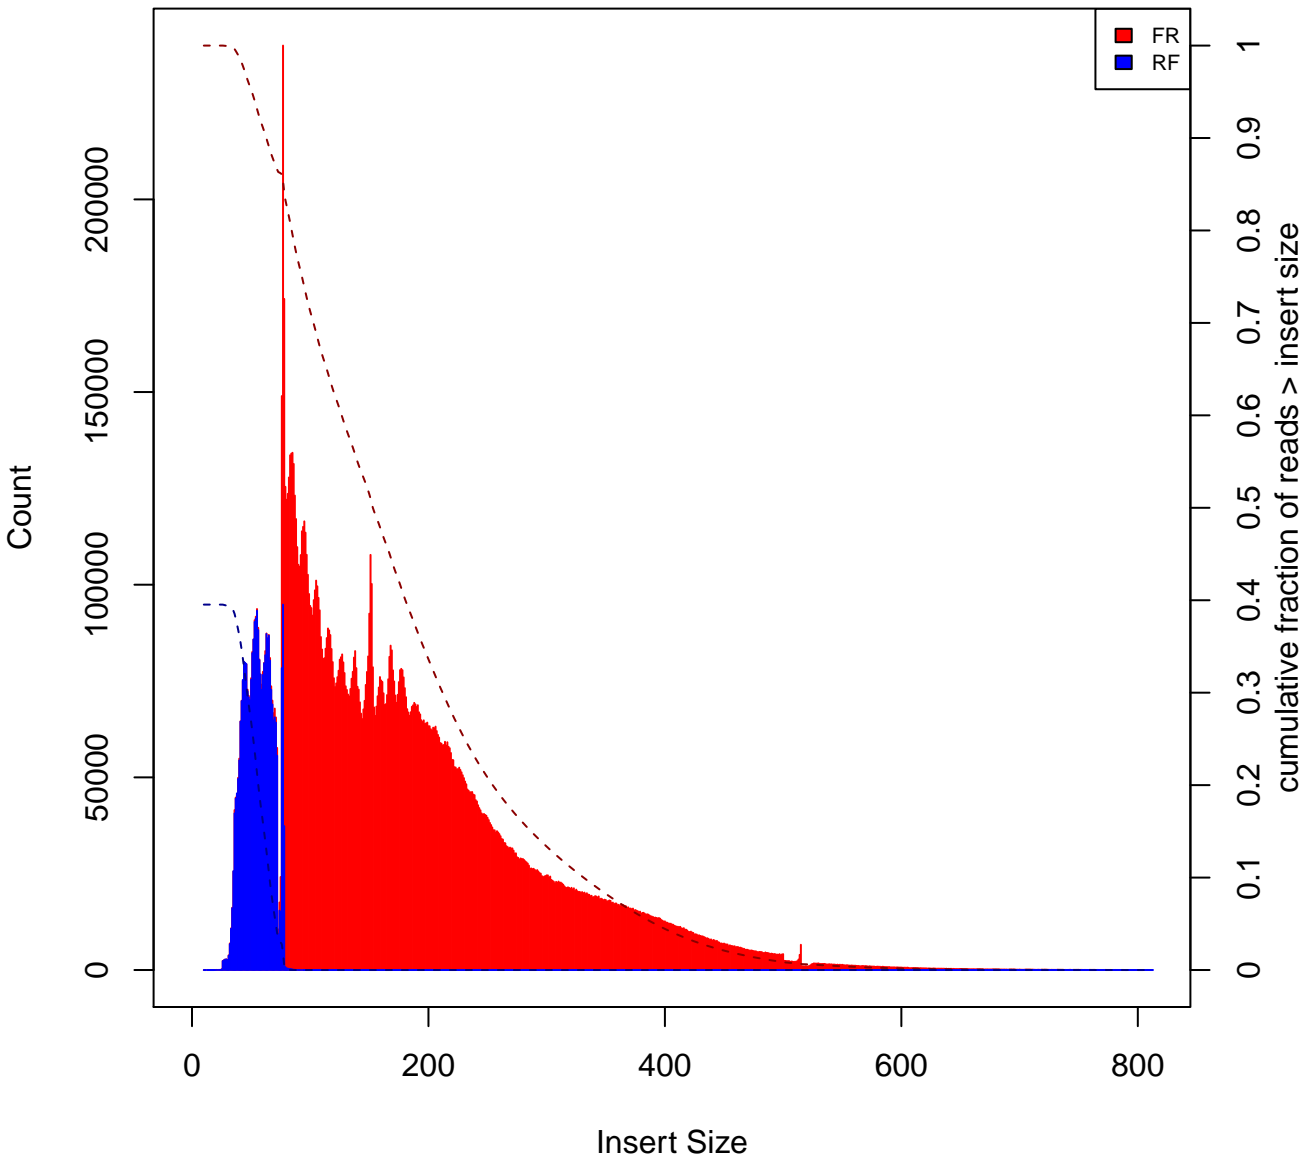



# Insert Size Histogram for All\_Reads in file S17\_BLN\_ATAC\_aligned.bam

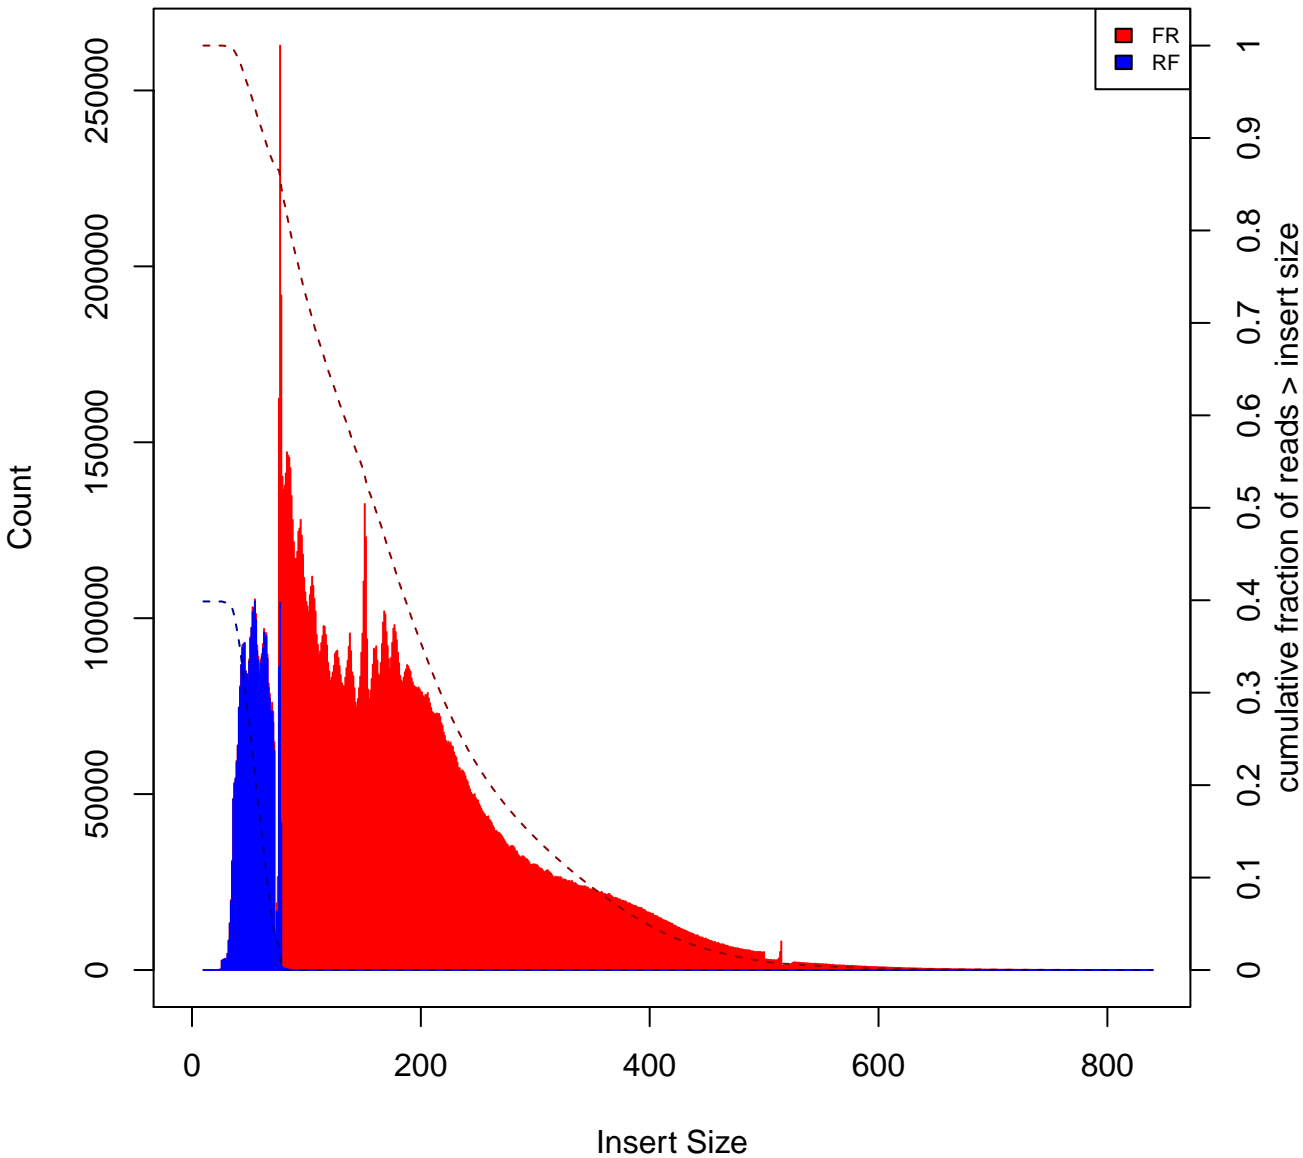

# Insert Size Histogram for All\_Reads in file S18\_BLN\_ATAC\_aligned.bam

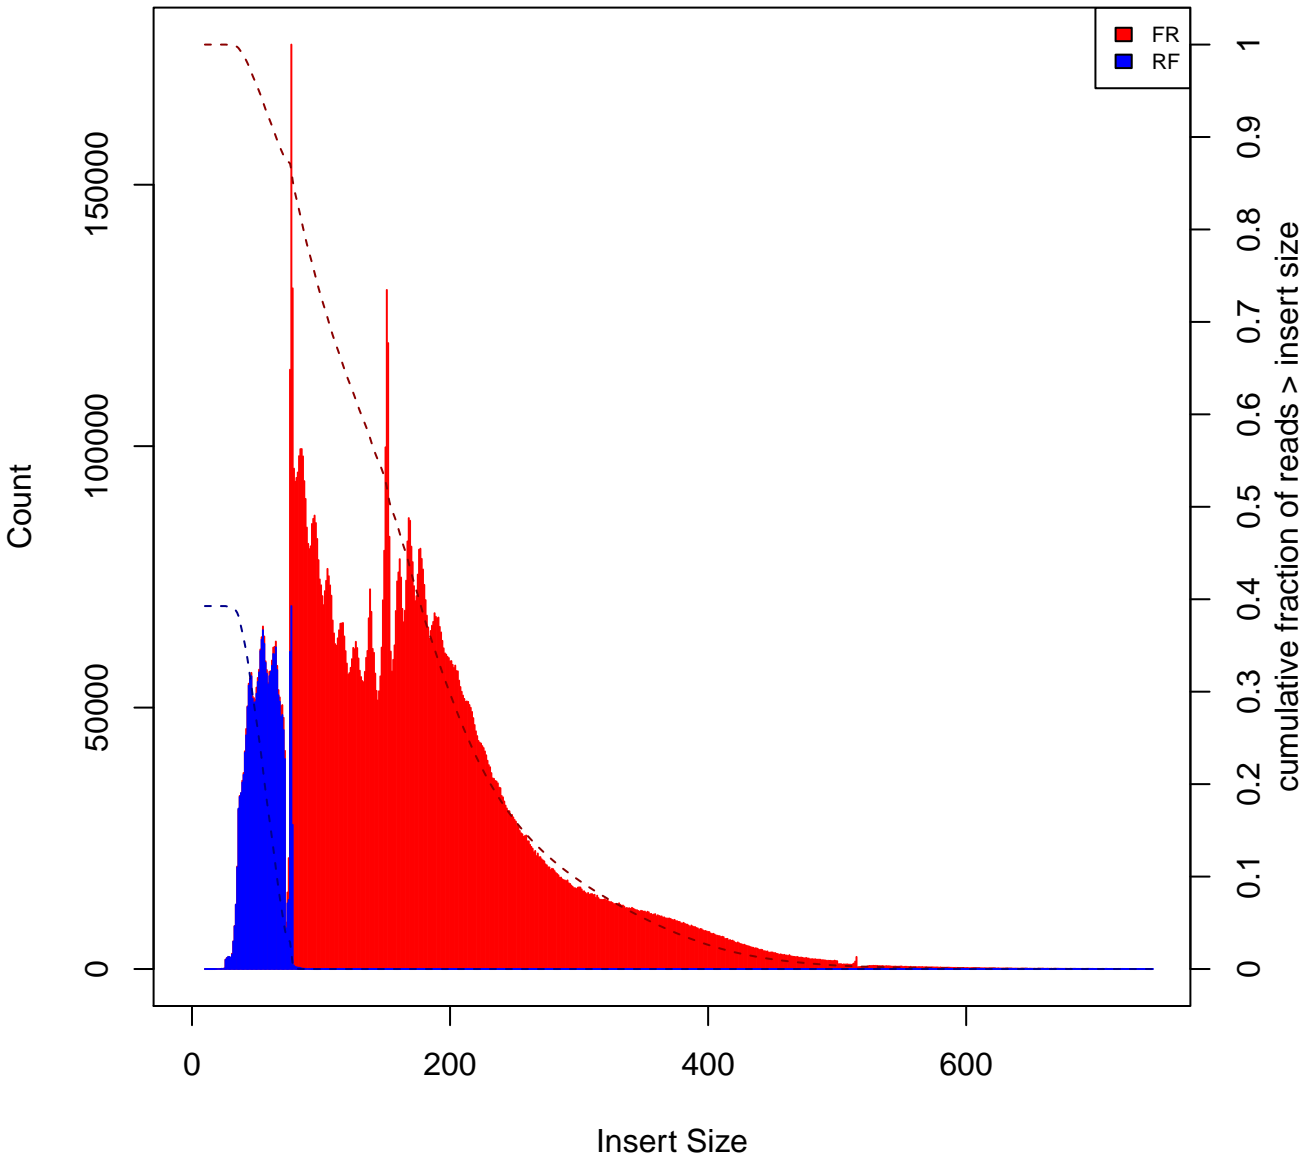

Supplement: 12864_2020_7268_MOESM13_ESM.pdf [file 12864_2020_7268_MOESM13_ESM.pdf]
